# Supplementary material for: Vampyromorph coleoid predation by an ichthyosaurian from the Early Jurassic Lagerstätte of Bascharage, Luxembourg
Source: PeerJ. 2025 Sep 8;13:e19786. doi: 10.7717/peerj.19786 (PMC12424614; doi:10.7717/peerj.19786)
Supplement: Supplemental Information 2 [file peerj-13-19786-s002.xlsx]

## Sheet: data_orig
Specimen	Species	Lower_jaw_length	Premaxilla_length	Humerus_length	Radius_width	Radius_length	Ulna_width	Ulna_length	Femur_length	Ischio-pubis_length
SMNS_3775	quadri	451	247	93	42	35	42	31	74	92
SMNS_6293	quadri	449	239	81	37	32	38	31	60	68
SMNS_7402	quadri	508	263	96	48	42	49	38	70	76
SMNS_10460	quadri	478	237	87	38	34	40	35	68	83
SMNS_14846	tri	638	346	92	47	42	50	37	76	83
SMNS_15033	quadri	503	243	104	51	45	56	45	83	83
SMNS_16811	quadri	524	257	106	45	39	50	38	80	91
SMNS_17500	uni	660	355	126	64	46	63	49	90	109
SMNS_50003	quadri	327	193	37	19	17	22	17	28	30
SMNS_50007	tri	615	364	105	42	35	49	37	73	77
SMNS_50963	quadri	514	272	98	43	37	45	34	76	96
SMNS_51142	quadri	516	248	105	48	41	53	39	80	91
SMNS_51829	tri	235	156	15	8	7	8	6	9	11
SMNS_51948	quadri	498	250	88	36	33	40	32	66	72
SMNS_52036	quadri	451	245	73	28	28	35	28	53	59
SMNS_53001	quadri	558	288	107	47	41	52	37	80	87
SMNS_54026	quadri	394	212	66	30	25	30	25	45	62
SMNS_54027	tri	546	304	83	35	33	42	33	56	69
SMNS_54051	quadri	345	200	39	20	18	21	19	27	32
SMNS_54062	quadri	462	236	79	33	31	39	28	63	69
SMNS_54064	quadri	495	264	89	39	34	43	33	66	73
SMNS_54816	quadri	463	221	85	35	34	39	30	63	72
SMNS_54872	quadri	274	154	27	16	15	17	14	17	23
SMNS_55109	quadri	238	141	16	8	7	8	7	11	14
SMNS_55748	quadri	519	282	99	46	43	51	42	82	83
SMNS_55934	quadri	430	232	66	27	23	30	25	46	59
SMNS_56615	quadri	326	194	34	17	15	19	15	23	25
SMNS_56631	quadri	340	198	38	18	16	20	15	25	27
SMNS_56856	quadri	437	251	76	39	30	39	31	57	59
SMNS_57009	quadri	273	161	24	10	11	13	10	17	20
SMNS_58881	quadri	410	197	80	38	37	38	31	58	70
SMNS_80062	quadri	400	202	49	23	20	25	20	30	41
SMNS_80113	tri	485	271	66	30	26	32	28	43	48
SMNS_80115	quadri	485	250	101	50	44	52	42	83	92
SMNS_81841	quadri	319	174	33	19	17	20	16	25	27
SMNS_82046	quadri	265	152	21	10	10	11	10	15	19
MHH_1a	tri	328	189	29	15	12	16	11	20	24
MHH_1981/25	uni	626	328	118	56	47	60	47	85	88
MHH_1981/33	quadri	195	117	15	7	7	7	6	8	10
MHH_1981/13	quadri	564	307	109	48	41	50	40	77	77
MHH_2a	tri	316	185	33	17	15	20	15	24	22
MHH_2c	quadri	329	205	24	14	12	15	12	18	19
MHH_3a	quadri	240	138	17	9	9	8	8	12	17
MHH_3b	tri	282	151	15	7	8	9	8	9	13
GPIT_RE/7299	quadri	373	213	51	27	21	27	23	36	42
GPIT_RE/7298	quadri	395	224	54	24	23	31	21	39	48
GPIT_IRE/208	quadri	222	138	13	7	7	9	7	10	11
GPIT_1491/1	quadri	477	261	96	49	40	54	38	74	99
GPIT_1491/2	quadri	534	278	103	47	43	39	50	74	101
GPIT_1491/8	quadri	522	251	99	39	35	41	33	74	85
GPIT_1491/9	quadri	550	264	107	43	38	45	35	80	99
GPIT_1491/10	uni	539	303	91	39	34	40	33	60	76
GPIT_1491/12	uni	614	332	116	56	42	54	43	77	106
GPIT_RE/7297	tri	550	321	76	33	28	38	28	51	65
MNHNL_TV2011	test	421	231	69	33	29	36	28	NA	NA

## Sheet: scaled_hu
Specimen	Species	Lower_jaw_length	Premaxilla_length	Radius_width	Radius_length	Ulna_width	Ulna_length	Femur_length	Ischio-pubis_length
SMNS_3775	quadri	4.84946	2.65591	0.451613	0.376344	0.451613	0.333333	0.795699	0.989247
SMNS_6293	quadri	5.54321	2.95062	0.45679	0.395062	0.469136	0.382716	0.740741	0.839506
SMNS_7402	quadri	5.29167	2.73958	0.5	0.4375	0.510417	0.395833	0.729167	0.791667
SMNS_10460	quadri	5.49425	2.72414	0.436782	0.390805	0.45977	0.402299	0.781609	0.954023
SMNS_14846	tri	6.93478	3.76087	0.51087	0.456522	0.543478	0.402174	0.826087	0.902174
SMNS_15033	quadri	4.83654	2.33654	0.490385	0.432692	0.538462	0.432692	0.798077	0.798077
SMNS_16811	quadri	4.9434	2.42453	0.424528	0.367925	0.471698	0.358491	0.754717	0.858491
SMNS_17500	uni	5.2381	2.81746	0.507937	0.365079	0.5	0.388889	0.714286	0.865079
SMNS_50003	quadri	8.83784	5.21622	0.513514	0.459459	0.594595	0.459459	0.756757	0.810811
SMNS_50007	tri	5.85714	3.46667	0.4	0.333333	0.466667	0.352381	0.695238	0.733333
SMNS_50963	quadri	5.2449	2.77551	0.438776	0.377551	0.459184	0.346939	0.77551	0.979592
SMNS_51142	quadri	4.91429	2.3619	0.457143	0.390476	0.504762	0.371429	0.761905	0.866667
SMNS_51829	tri	15.6667	10.4	0.533333	0.466667	0.533333	0.4	0.6	0.733333
SMNS_51948	quadri	5.65909	2.84091	0.409091	0.375	0.454545	0.363636	0.75	0.818182
SMNS_52036	quadri	6.17808	3.35616	0.383562	0.383562	0.479452	0.383562	0.726027	0.808219
SMNS_53001	quadri	5.21495	2.69159	0.439252	0.383178	0.485981	0.345794	0.747664	0.813084
SMNS_54026	quadri	5.9697	3.21212	0.454545	0.378788	0.454545	0.378788	0.681818	0.939394
SMNS_54027	tri	6.57831	3.66265	0.421687	0.39759	0.506024	0.39759	0.674699	0.831325
SMNS_54051	quadri	8.84615	5.12821	0.512821	0.461538	0.538462	0.487179	0.692308	0.820513
SMNS_54062	quadri	5.8481	2.98734	0.417722	0.392405	0.493671	0.35443	0.797468	0.873418
SMNS_54064	quadri	5.5618	2.96629	0.438202	0.382022	0.483146	0.370787	0.741573	0.820225
SMNS_54816	quadri	5.44706	2.6	0.411765	0.4	0.458824	0.352941	0.741176	0.847059
SMNS_54872	quadri	10.1481	5.7037	0.592593	0.555556	0.62963	0.518519	0.62963	0.851852
SMNS_55109	quadri	14.875	8.8125	0.5	0.4375	0.5	0.4375	0.6875	0.875
SMNS_55748	quadri	5.24242	2.84848	0.464646	0.434343	0.515152	0.424242	0.828283	0.838384
SMNS_55934	quadri	6.51515	3.51515	0.409091	0.348485	0.454545	0.378788	0.69697	0.893939
SMNS_56615	quadri	9.58824	5.70588	0.5	0.441176	0.558824	0.441176	0.676471	0.735294
SMNS_56631	quadri	8.94737	5.21053	0.473684	0.421053	0.526316	0.394737	0.657895	0.710526
SMNS_56856	quadri	5.75	3.30263	0.513158	0.394737	0.513158	0.407895	0.75	0.776316
SMNS_57009	quadri	11.375	6.70833	0.416667	0.458333	0.541667	0.416667	0.708333	0.833333
SMNS_58881	quadri	5.125	2.4625	0.475	0.4625	0.475	0.3875	0.725	0.875
SMNS_80062	quadri	8.16327	4.12245	0.469388	0.408163	0.510204	0.408163	0.612245	0.836735
SMNS_80113	tri	7.34848	4.10606	0.454545	0.393939	0.484848	0.424242	0.651515	0.727273
SMNS_80115	quadri	4.80198	2.47525	0.49505	0.435644	0.514851	0.415842	0.821782	0.910891
SMNS_81841	quadri	9.66667	5.27273	0.575758	0.515152	0.606061	0.484848	0.757576	0.818182
SMNS_82046	quadri	12.619	7.2381	0.47619	0.47619	0.52381	0.47619	0.714286	0.904762
MHH_1a	tri	11.3103	6.51724	0.517241	0.413793	0.551724	0.37931	0.689655	0.827586
MHH_1981/25	uni	5.30508	2.77966	0.474576	0.398305	0.508475	0.398305	0.720339	0.745763
MHH_1981/33	quadri	13	7.8	0.466667	0.466667	0.466667	0.4	0.533333	0.666667
MHH_1981/13	quadri	5.17431	2.81651	0.440367	0.376147	0.458716	0.366972	0.706422	0.706422
MHH_2a	tri	9.57576	5.60606	0.515152	0.454545	0.606061	0.454545	0.727273	0.666667
MHH_2c	quadri	13.7083	8.54167	0.583333	0.5	0.625	0.5	0.75	0.791667
MHH_3a	quadri	14.1176	8.11765	0.529412	0.529412	0.470588	0.470588	0.705882	1
MHH_3b	tri	18.8	10.0667	0.466667	0.533333	0.6	0.533333	0.6	0.866667
GPIT_RE/7299	quadri	7.31373	4.17647	0.529412	0.411765	0.529412	0.45098	0.705882	0.823529
GPIT_RE/7298	quadri	7.31481	4.14815	0.444444	0.425926	0.574074	0.388889	0.722222	0.888889
GPIT_IRE/208	quadri	17.0769	10.6154	0.538462	0.538462	0.692308	0.538462	0.769231	0.846154
GPIT_1491/1	quadri	4.96875	2.71875	0.510417	0.416667	0.5625	0.395833	0.770833	1.03125
GPIT_1491/2	quadri	5.18447	2.69903	0.456311	0.417476	0.378641	0.485437	0.718447	0.980583
GPIT_1491/8	quadri	5.27273	2.53535	0.393939	0.353535	0.414141	0.333333	0.747475	0.858586
GPIT_1491/9	quadri	5.14019	2.46729	0.401869	0.35514	0.420561	0.327103	0.747664	0.925234
GPIT_1491/10	uni	5.92308	3.32967	0.428571	0.373626	0.43956	0.362637	0.659341	0.835165
GPIT_1491/12	uni	5.2931	2.86207	0.482759	0.362069	0.465517	0.37069	0.663793	0.913793
GPIT_RE/7297	tri	7.23684	4.22368	0.434211	0.368421	0.5	0.368421	0.671053	0.855263
MNHNL_TV2011	test	6.10145	3.34783	0.478261	0.42029	0.521739	0.405797	NA	NA
