# Supplementary material for: Vampyromorph coleoid predation by an ichthyosaurian from the Early Jurassic Lagerstätte of Bascharage, Luxembourg
Source: PeerJ. 2025 Sep 8;13:e19786. doi: 10.7717/peerj.19786 (PMC12424614; doi:10.7717/peerj.19786)
Supplement: Supplemental Information 3 [file peerj-13-19786-s003.xlsx]

## Sheet: Ratios
Species	Total_length	Mandibular_aspect	Closing_mech_advantage	Crown_shape	Sclerotic_ring_opening	Pectoral_fin_aspect	Caudal_fin_aspect
Stenopterygius_triscissus	2000	0.0376428	0.0823694	2.44	36.1	3.65283	3.01176
Pachycormus_macropterus	600.293	0.176319	0.249741	2.7	18	4.28167	4.34316
Saurostomus_esocinus	1374.67	0.153506	0.218336	1.84	21	2.35627	3.00653

## Sheet: Details&Measurements
Species	Data sources	Total_length	Mandible length (mm)	Mandible area (mm2)	Mandibular_aspect_ratio	Articulation to coronoid (mm)	Articulation to mesialmost tooth	Closing_mech_advantage	Crown height (mm)	Crown base diameter (mm)	Crown_shape	Sclerotic_ring_opening	Pectoral fin surface (mm2)	Pectoral fin length	Pectoral_fin_aspect	Caudal fin area (mm2)	Caudal fin length (mm)	Caudal_fin_aspect
Stenopterygius_triscissus	MNHNL TV211 for all traits except Maisch 2008 (GPIT 1491/1; for pectoral fin ratio) and Lingham-Soliar 2001 (SMF 457; for caudal fin ratio)	2000	424	6767.27	0.0376428	32.977	400.355	0.0823694	6.1	2.5	2.44	36.1	53000	440	3.65283	76500	480	3.01176
Pachycormus_macropterus	Friedman 2012 except sclerotic ring: Wiiliams et al 2015 (BRLSI M1038); pectoral fin and caudal fin ratio: Wretman et al 2016 (NHMUK 12913)	600.293	NA	NA	0.176319	NA	NA	0.249741	NA	NA	2.7	18	2826	110	4.28167	7460	180	4.34316
Saurostomus_esocinus	Falciform 1 morphotype; Friedman 2012 except sclerotic ring: Cooper & Maxwell 2022 (BRLSI M1038); pectoral fin ratio and caudal fin ratio: Cooper & Maxwell 2022 (SMNS51199)	1374.67	NA	NA	0.153506	NA	NA	0.218336	NA	NA	1.84	21	9549	150	2.35627	18525	236	3.00653
